# Supplementary material
Source: HighWire-hosted journal article supplement (http://jpet.aspetjournals.org/highwire/filestream/144759/field_highwire_adjunct_files/0/257097SupplData.pdf)
Supplement: 257097SupplData.pdf [file 257097SupplData.pdf]

## SUPPLEMENTARY DATA TO:

### Cellular Vesicles: New insights in engineering methods, interaction with cells and potential for brain targeting

A. Marazioti<sup>1</sup>, K. Papadia<sup>2</sup>, M.Kannavou<sup>1,2</sup>, A. Basta<sup>1,2</sup>, M. Spella<sup>3</sup>, A-L de Lastic<sup>4</sup>, M. Rodi<sup>4</sup>, A. Mouzaki<sup>4</sup>, M. Samiotaki<sup>5</sup>, G. Panayotou<sup>5</sup>, G.T. Stathopoulos<sup>3, 6</sup>, S.G. Antimisiaris<sup>1,2</sup>.

<sup>1</sup> Foundation for Research and Technology Hellas, Institute of Chemical Engineering Sciences, FORTH/ICE-HT, Rio 26504, Greece

<sup>2</sup> Laboratory of Pharmaceutical Technology, Department of Pharmacy, University of Patras, Rio 26510, Greece

<sup>3</sup> Laboratory for Molecular Respiratory Carcinogenesis, Department of Physiology, Faculty of Medicine, University of Patras, Rio 26510, Greece

<sup>4</sup> Laboratory of Immunohematology, Division of Hematology, Department of Internal Medicine, Medical School, University of Patras, Patras, Greece

<sup>5</sup> B.S.R.C. Alexander Fleming, 16672 Vari, Attica, Greece.

<sup>6</sup> Comprehensive Pneumology Center (CPC) and Institute for Lung Biology and Disease (iLBD), University Hospital, Ludwig-Maximilians University and Helmholtz Center Munich, Member of the German Center for Lung Research (DZL); Max-Lebsche-Platz 31, 81377 Munich, Bavaria, Germany

#### 1. Cytotoxicity of CVs (24h)

The viability (% compared to control) of CVshCMEC/D3 and CVsB16 towards hCMEC/D3 and B16 cells following 24h incubation of CVs at doses of 6, 12 and 24 nmoles (lipid)/3x10<sup>4</sup> cells was evaluated and results are shown in Figure S1.

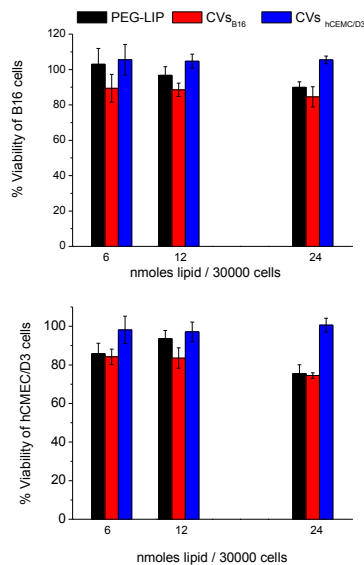

**Figure S1.** % Viability of B16 (top graph) and hCMEC/D3 (bottom graph) cells after 24h incubation with CVsB16, CVshCMEC/D3 and Pegylated liposomes (PEG-LIP).

## 2. Effect of using Trypsin during CV isolation on CV uptake by cells

CV uptake by hCMEC/D3 cells was evaluated with two sets of CV<sub>hCMEC/D3</sub>, in order to evaluate if the use of trypsin as a cell detaching agent (during CV preparation) has any effect on the uptake of the CVs by the cells.

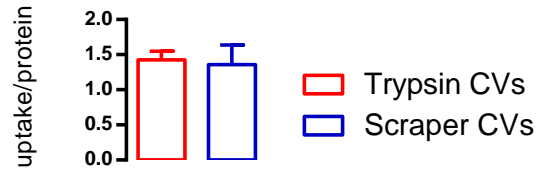

**Figure S2.** % Uptake of CV<sub>hCMEC/D3</sub> by hCMEC/D3 cells; CVs were produced by trypsin detached cells (Trypsin CVs) and scraper detached cells (Scraper CVs)

It is proven (Fig. S2) that the use of trypsin (as a cell detaching method) during CV<sub>hCMEC/D3</sub> preparation did not decrease their uptake by hCMEC/D3 cells compared to CVs prepared without using trypsin

## 3. Confocal microscopy Studies

Confocal microscopy micrographs for the uptake of CVs from different cell types by B16 cells are presented. CVs (200nmol or 400nmol lipid) were incubated for 4 h with  $10^6$  cells and observed under confocal microscope. All methods are reported in detail in the materials and methods section of the manuscript.

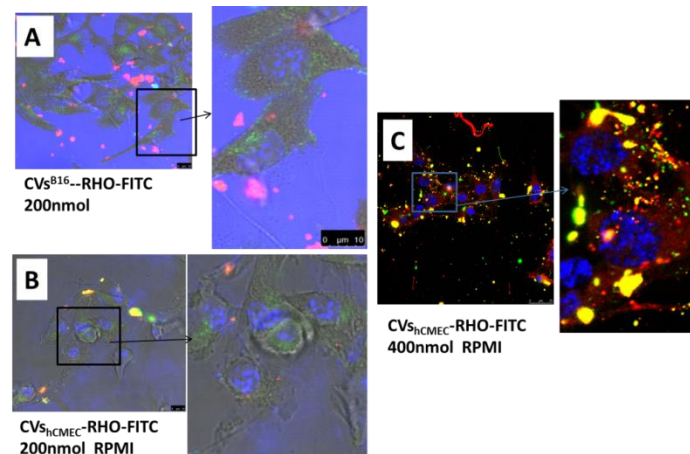

**Figure S3.** A] Uptake of CVs<sub>B16</sub> (200nmol lipid) by B16 cells; **B and C]** Uptake of CVs<sub>hCMEC/D3</sub> (produced by cells grown in RPMI) by B16 cells, after incubation of 200nmol lipid (B) and 400nmole lipid (C).

## 4. TEM study of CV<sub>hCMEC/D3</sub> morphology

Representative TEM micrographs of CV<sub>hCMEC/D3</sub>, prepared from cells that were grown in EndoGro and RPMI medium. Negative staining was performed with ammonium molybdate as mentioned in detail in the methods section of the manuscript. As seen, the two types of CVs are morphologically similar.

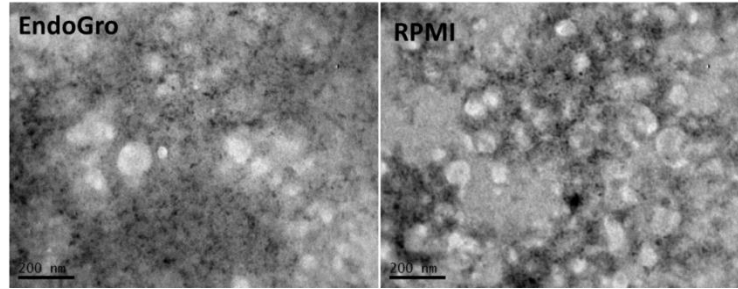

**Figure S4.** Representative TEM micrographs of CVshCMEC/D3, prepared from cells that were grown in EndoGro, and RPMI medium.

## 5. Supplementary data of Proteomic Analysis study

**Table S1.** Proteins identified in CV<sub>shCMEC/D3</sub>

| T: Protein names                                                                                            | T: Gene names        |
|-------------------------------------------------------------------------------------------------------------|----------------------|
| Talin-1                                                                                                     | TLN1                 |
| 40S ribosomal protein S9                                                                                    | RPS9                 |
| Clathrin heavy chain;Clathrin heavy chain 1                                                                 | CLTC                 |
| Extended synaptotagmin-2                                                                                    | ESYT2                |
| Tumor protein D54                                                                                           | TPD52L2              |
| Four and a half LIM domains protein 2                                                                       | FHL2                 |
| Vacuolar protein sorting-associated protein 33A                                                             | VPS33A               |
| Small nuclear ribonucleoprotein E                                                                           | SNRPE                |
| Structural maintenance of chromosomes flexible hinge domain-containing protein 1                            | SMCHD1               |
| 60S ribosomal protein L23a                                                                                  | RPL23A               |
| Eukaryotic translation initiation factor 3 subunit L                                                        | EIF3L                |
| GTP-binding nuclear protein Ran                                                                             | RAN                  |
| 10 kDa heat shock protein, mitochondrial                                                                    | HSPE1;HSPE1-MOB4     |
| Protein transport protein Sec31A                                                                            | SEC31A               |
| High mobility group protein B3                                                                              | HMGB3                |
| Dynactin subunit 1                                                                                          | DCTN1;DKFZp686E075 2 |
| Heterogeneous nuclear ribonucleoprotein H;Heterogeneous nuclear ribonucleoprotein H, N-terminally processed | HNRNPH1              |
| Unconventional myosin-Ib                                                                                    | MYO1B                |
| Nuclear pore complex protein Nup155                                                                         | NUP155               |
| Prohibitin-2                                                                                                | PHB2                 |
| Actin-related protein 2/3 complex subunit 4                                                                 | ARPC4-TTLL3;ARPC4    |
| Translocating chain-associated membrane protein 1                                                           | TRAM1                |
| Tumor protein D52;28S ribosomal protein S28, mitochondrial                                                  | TPD52;MRPS28         |
| ATP-binding cassette sub-family F member 1                                                                  | ABCF1                |
| RNA-binding protein FUS                                                                                     | FUS                  |
| Protein disulfide-isomerase                                                                                 | P4HB                 |
| Mitochondrial import inner membrane translocase subunit TIM44                                               | TIMM44               |
| Very-long-chain enoyl-CoA reductase                                                                         | TECR                 |
| Syntaxin-binding protein 3                                                                                  | STXBP3               |
| Importin-5                                                                                                  | IPO5                 |
| Histone deacetylase complex subunit SAP18                                                                   | SAP18                |
| Secretory carrier-associated membrane protein 3                                                             | SCAMP3               |
| Actin-related protein 2/3 complex subunit 1B                                                                | ARPC1B               |
| Membrane-associated progesterone receptor component 2                                                       | PGRMC2               |
| 26S proteasome non-ATPase regulatory subunit 3                                                              | PSMD3                |
| TBC1 domain family member 4                                                                                 | TBC1D4               |
| Perilipin-3                                                                                                 | PLIN3                |
| UDP-glucose 6-dehydrogenase                                                                                 | UGDH                 |
| General vesicular transport factor p115                                                                     | USO1                 |
| NADH dehydrogenase [ubiquinone] iron-sulfur protein 6, mitochondrial                                        | NDUFS6               |
| Vesicle-trafficking protein SEC22b                                                                          | SEC22B               |
| Protein transport protein Sec24D                                                                            | SEC24D               |
| Glutaminase kidney isoform, mitochondrial                                                                   | GLS                  |
| NADH dehydrogenase [ubiquinone] 1 alpha subcomplex subunit 7                                                | NDUFA7               |
| Polypyrimidine tract-binding protein 3                                                                      | PTBP3                |

|                                                                                                                                                                                                                                                                                                                                                                                                                    |               |
|--------------------------------------------------------------------------------------------------------------------------------------------------------------------------------------------------------------------------------------------------------------------------------------------------------------------------------------------------------------------------------------------------------------------|---------------|
| NADH-cytochrome b5 reductase 3;NADH-cytochrome b5 reductase 3 membrane-bound form;NADH-cytochrome b5 reductase 3 soluble form                                                                                                                                                                                                                                                                                      | CYB5R3        |
| Catalase                                                                                                                                                                                                                                                                                                                                                                                                           | CAT           |
| Dolichyl-diphosphooligosaccharide--protein glycosyltransferase subunit 2                                                                                                                                                                                                                                                                                                                                           | RPN2          |
| 60S acidic ribosomal protein P0;60S acidic ribosomal protein P0-like                                                                                                                                                                                                                                                                                                                                               | RPLP0;RPLP0P6 |
| Keratin, type I cytoskeletal 18                                                                                                                                                                                                                                                                                                                                                                                    | KRT18         |
| ATP synthase subunit beta, mitochondrial;ATP synthase subunit beta                                                                                                                                                                                                                                                                                                                                                 | ATP5B         |
| 2,3-cyclic-nucleotide 3-phosphodiesterase                                                                                                                                                                                                                                                                                                                                                                          | CNP           |
| Splicing factor U2AF 35 kDa subunit;Splicing factor U2AF 26 kDa subunit                                                                                                                                                                                                                                                                                                                                            | U2AF1;U2AF1L4 |
| Heat shock cognate 71 kDa protein                                                                                                                                                                                                                                                                                                                                                                                  | HSPA8         |
| ADP/ATP translocase 3;ADP/ATP translocase 3, N-terminally processed                                                                                                                                                                                                                                                                                                                                                | SLC25A6       |
| Inosine-5-monophosphate dehydrogenase 2                                                                                                                                                                                                                                                                                                                                                                            | IMPDH2        |
| Protein disulfide-isomerase A4                                                                                                                                                                                                                                                                                                                                                                                     | PDIA4         |
| Heterogeneous nuclear ribonucleoprotein L                                                                                                                                                                                                                                                                                                                                                                          | HNRNPL        |
| Aspartate--tRNA ligase, cytoplasmic                                                                                                                                                                                                                                                                                                                                                                                | DARS          |
| Sarcoplasmic/endoplasmic reticulum calcium ATPase 2                                                                                                                                                                                                                                                                                                                                                                | ATP2A2        |
| High mobility group protein HMG-I/HMG-Y                                                                                                                                                                                                                                                                                                                                                                            | HMGA1         |
| Integrin alpha-2                                                                                                                                                                                                                                                                                                                                                                                                   | ITGA2         |
| T-complex protein 1 subunit alpha                                                                                                                                                                                                                                                                                                                                                                                  | TCP1          |
| Nucleolin                                                                                                                                                                                                                                                                                                                                                                                                          | NCL           |
| Interferon-induced GTP-binding protein Mx1;Interferon-induced GTP-binding protein Mx1, N-terminally processed                                                                                                                                                                                                                                                                                                      | MX1           |
| Proteasome subunit beta type-1                                                                                                                                                                                                                                                                                                                                                                                     | PSMB1         |
| Amine oxidase [flavin-containing] A                                                                                                                                                                                                                                                                                                                                                                                | MAOA          |
| 5-nucleotidase                                                                                                                                                                                                                                                                                                                                                                                                     | NT5E          |
| Protein-glutamine gamma-glutamyltransferase 2                                                                                                                                                                                                                                                                                                                                                                      | TGM2          |
| Tryptophan--tRNA ligase, cytoplasmic;T1-TrpRS;T2-TrpRS                                                                                                                                                                                                                                                                                                                                                             | WARS          |
| Plasma membrane calcium-transporting ATPase 4                                                                                                                                                                                                                                                                                                                                                                      | ATP2B4        |
| ATP synthase F(0) complex subunit B1, mitochondrial                                                                                                                                                                                                                                                                                                                                                                | ATP5F1        |
| Low molecular weight phosphotyrosine protein phosphatase                                                                                                                                                                                                                                                                                                                                                           | ACP1          |
| Proteasome subunit alpha type-1;Proteasome subunit alpha type                                                                                                                                                                                                                                                                                                                                                      | PSMA1         |
| Erythrocyte band 7 integral membrane protein                                                                                                                                                                                                                                                                                                                                                                       | STOM          |
| Proteasome subunit beta type-5                                                                                                                                                                                                                                                                                                                                                                                     | PSMB5         |
| Ephrin type-A receptor 2                                                                                                                                                                                                                                                                                                                                                                                           | EPHA2         |
| Transketolase                                                                                                                                                                                                                                                                                                                                                                                                      | TKT           |
| HLA class I histocompatibility antigen, Cw-12 alpha chain;HLA class I histocompatibility antigen, Cw-15 alpha chain;HLA class I histocompatibility antigen, Cw-8 alpha chain;HLA class I histocompatibility antigen, Cw-14 alpha chain;HLA class I histocompatibility antigen, Cw-4 alpha chain;HLA class I histocompatibility antigen, Cw-16 alpha chain;HLA class I histocompatibility antigen, Cw-5 alpha chain | HLA-C         |
| Aldehyde dehydrogenase X, mitochondrial                                                                                                                                                                                                                                                                                                                                                                            | ALDH1B1       |
| DnaJ homolog subfamily A member 1                                                                                                                                                                                                                                                                                                                                                                                  | DNAJA1        |
| Cytochrome b-c1 complex subunit 1, mitochondrial                                                                                                                                                                                                                                                                                                                                                                   | UQCRC1        |
| Heterogeneous nuclear ribonucleoprotein H3                                                                                                                                                                                                                                                                                                                                                                         | HNRNPH3       |
| Serine hydroxymethyltransferase, mitochondrial                                                                                                                                                                                                                                                                                                                                                                     | SHMT2         |
| Prohibitin                                                                                                                                                                                                                                                                                                                                                                                                         | PHB           |
| Coatomer subunit beta                                                                                                                                                                                                                                                                                                                                                                                              | COPB2         |
| 60S ribosomal protein L4                                                                                                                                                                                                                                                                                                                                                                                           | RPL4          |
| Transgelin-2                                                                                                                                                                                                                                                                                                                                                                                                       | TAGLN2        |
| V-type proton ATPase catalytic subunit A                                                                                                                                                                                                                                                                                                                                                                           | ATP6V1A       |
| Stress-70 protein, mitochondrial                                                                                                                                                                                                                                                                                                                                                                                   | HSPA9         |
| 60S ribosomal protein L13a                                                                                                                                                                                                                                                                                                                                                                                         | RPL13A;RPL13a |
| Malate dehydrogenase, mitochondrial;Malate dehydrogenase                                                                                                                                                                                                                                                                                                                                                           | MDH2          |
| Signal transducer and activator of transcription 1-alpha/beta;Signal transducer and activator of transcription                                                                                                                                                                                                                                                                                                     | STAT1         |
| Microtubule-associated protein 1B;MAP1B heavy chain;MAP1 light chain LC1                                                                                                                                                                                                                                                                                                                                           | MAP1B         |
| Eukaryotic translation initiation factor 1A, X-chromosomal;Eukaryotic translation initiation factor 1A, Y-chromosomal                                                                                                                                                                                                                                                                                              | EIF1AX;EIF1AY |
| ATP synthase subunit O, mitochondrial                                                                                                                                                                                                                                                                                                                                                                              | ATP5O         |
| Elongation factor Tu, mitochondrial                                                                                                                                                                                                                                                                                                                                                                                | TUFM          |
| Signal recognition particle 9 kDa protein                                                                                                                                                                                                                                                                                                                                                                          | SRP9          |
| Heterogeneous nuclear ribonucleoprotein A3                                                                                                                                                                                                                                                                                                                                                                         | HNRNPA3       |
| Importin subunit alpha-1                                                                                                                                                                                                                                                                                                                                                                                           | KPNA2         |
| Rap1 GTPase-GDP dissociation stimulator 1                                                                                                                                                                                                                                                                                                                                                                          | RAP1GDS1      |
| Methionine aminopeptidase 1                                                                                                                                                                                                                                                                                                                                                                                        | METAP1        |
| Coatomer subunit beta                                                                                                                                                                                                                                                                                                                                                                                              | COPB1         |
| Transitional endoplasmic reticulum ATPase                                                                                                                                                                                                                                                                                                                                                                          | VCP           |
| 40S ribosomal protein S7                                                                                                                                                                                                                                                                                                                                                                                           | RPS7          |
| 26S protease regulatory subunit 8                                                                                                                                                                                                                                                                                                                                                                                  | PSMC5         |
| 40S ribosomal protein S8                                                                                                                                                                                                                                                                                                                                                                                           | RPS8          |
| 40S ribosomal protein S15a                                                                                                                                                                                                                                                                                                                                                                                         | RPS15A        |
| Small nuclear ribonucleoprotein F                                                                                                                                                                                                                                                                                                                                                                                  | SNRPF         |
| 40S ribosomal protein S25                                                                                                                                                                                                                                                                                                                                                                                          | RPS25         |
| Guanine nucleotide-binding protein G(I)/G(S)/G(T) subunit beta-2                                                                                                                                                                                                                                                                                                                                                   | GNB2          |
| 60S ribosomal protein L10a                                                                                                                                                                                                                                                                                                                                                                                         | RPL10A        |
| 60S ribosomal protein L11                                                                                                                                                                                                                                                                                                                                                                                          | RPL11         |

|                                                                                                                                                                                                                                                                                              |                |
|----------------------------------------------------------------------------------------------------------------------------------------------------------------------------------------------------------------------------------------------------------------------------------------------|----------------|
| Ubiquitin-40S ribosomal protein S27a;Ubiquitin;40S ribosomal protein S27a;Polyubiquitin-B;Ubiquitin;Polyubiquitin-C;Ubiquitin                                                                                                                                                                | RPS27A;UBB;UBC |
| AP-2 complex subunit beta                                                                                                                                                                                                                                                                    | AP2B1          |
| Guanine nucleotide-binding protein subunit beta-2-like 1;Guanine nucleotide-binding protein subunit beta-2-like 1, N-terminally processed                                                                                                                                                    | GNB2L1         |
| General transcription factor II-1                                                                                                                                                                                                                                                            | GTF2I          |
| DNA-dependent protein kinase catalytic subunit                                                                                                                                                                                                                                               | PRKDC          |
| HLA class I histocompatibility antigen, B-40 alpha chain;HLA class I histocompatibility antigen, B-47 alpha chain;HLA class I histocompatibility antigen, B-27 alpha chain;HLA class I histocompatibility antigen, B-13 alpha chain;HLA class I histocompatibility antigen, B-44 alpha chain | HLA-B          |
| Glutamine--fructose-6-phosphate aminotransferase [isomerizing] 1                                                                                                                                                                                                                             | GFPT1          |
| Peroxioredoxin-1                                                                                                                                                                                                                                                                             | PRDX1          |
| Cytoskeleton-associated protein 4                                                                                                                                                                                                                                                            | CKAP4          |
| Quinone oxidoreductase                                                                                                                                                                                                                                                                       | CRYZ           |
| Splicing factor 3A subunit 3                                                                                                                                                                                                                                                                 | SF3A3          |
| Aminoacyl tRNA synthase complex-interacting multifunctional protein 1;Endothelial monocyte-activating polypeptide 2                                                                                                                                                                          | AIMP1          |
| Interleukin enhancer-binding factor 3                                                                                                                                                                                                                                                        | ILF3           |
| Heat shock protein 75 kDa, mitochondrial                                                                                                                                                                                                                                                     | TRAP1          |
| Cleavage stimulation factor subunit 3                                                                                                                                                                                                                                                        | CSTF3          |
| Chromobox protein homolog 3                                                                                                                                                                                                                                                                  | CBX3           |
| Serine/arginine-rich splicing factor 6                                                                                                                                                                                                                                                       | SRSF6          |
| Transcription intermediary factor 1-beta                                                                                                                                                                                                                                                     | TRIM28         |
| Peptidyl-prolyl cis-trans isomerase FKBP5;Peptidyl-prolyl cis-trans isomerase FKBP5, N-terminally processed                                                                                                                                                                                  | FKBP5          |
| Sequestosome-1                                                                                                                                                                                                                                                                               | SQSTM1         |
| CD166 antigen                                                                                                                                                                                                                                                                                | ALCAM          |
| DNA replication licensing factor MCM6                                                                                                                                                                                                                                                        | MCM6           |
| Major vault protein                                                                                                                                                                                                                                                                          | MVP            |
| Poly(rC)-binding protein 1                                                                                                                                                                                                                                                                   | PCBP1          |
| Microtubule-associated protein RP/EB family member 1                                                                                                                                                                                                                                         | MAPRE1         |
| Pre-rRNA-processing protein TSR1 homolog                                                                                                                                                                                                                                                     | TSR1           |
| MAP7 domain-containing protein 1                                                                                                                                                                                                                                                             | MAP7D1         |
| E3 ubiquitin-protein ligase BRE1A                                                                                                                                                                                                                                                            | RNF20          |
| Golgi-associated plant pathogenesis-related protein 1                                                                                                                                                                                                                                        | GLIPR2         |
| Atlastin-3                                                                                                                                                                                                                                                                                   | ATL3           |
| Pre-mRNA-processing-splicing factor 8                                                                                                                                                                                                                                                        | PRPF8          |
| Inhibitor of nuclear factor kappa-B kinase-interacting protein                                                                                                                                                                                                                               | IKBIP          |
| Staphylococcal nuclease domain-containing protein 1                                                                                                                                                                                                                                          | SND1           |
| Zinc finger CCCH-type antiviral protein 1                                                                                                                                                                                                                                                    | ZC3HAV1        |
| Protein PAT1 homolog 1                                                                                                                                                                                                                                                                       | PATL1          |
| Dipeptidyl peptidase 9                                                                                                                                                                                                                                                                       | DPP9           |
| Aldehyde dehydrogenase family 16 member A1                                                                                                                                                                                                                                                   | ALDH16A1       |
| Leucine-rich repeat-containing protein 47                                                                                                                                                                                                                                                    | LRRC47         |
| Interferon-induced protein 44                                                                                                                                                                                                                                                                | IFI44          |
| Gem-associated protein 5                                                                                                                                                                                                                                                                     | GEMIN5         |
| Rho guanine nucleotide exchange factor 2                                                                                                                                                                                                                                                     | ARHGEF2        |
| Ribosomal RNA small subunit methyltransferase NEP1                                                                                                                                                                                                                                           | EMG1           |
| FAS-associated factor 2                                                                                                                                                                                                                                                                      | FAF2           |
| RNA-binding protein 14                                                                                                                                                                                                                                                                       | RBM14          |
| Niban-like protein 1                                                                                                                                                                                                                                                                         | FAM129B        |
| Synaptic vesicle membrane protein VAT-1 homolog                                                                                                                                                                                                                                              | VAT1           |
| Rab3 GTPase-activating protein non-catalytic subunit                                                                                                                                                                                                                                         | RAB3GAP2       |
| Thioredoxin-related transmembrane protein 1                                                                                                                                                                                                                                                  | TMX1           |
| Nucleolar RNA helicase 2                                                                                                                                                                                                                                                                     | DDX21          |
| ATP-dependent RNA helicase DDX18                                                                                                                                                                                                                                                             | DDX18          |
| U3 small nucleolar RNA-associated protein 6 homolog                                                                                                                                                                                                                                          | UTP6           |
| Rabankyrin-5                                                                                                                                                                                                                                                                                 | ANKFY1         |
| V-type proton ATPase subunit H                                                                                                                                                                                                                                                               | ATP6V1H        |
| Pre-mRNA-processing factor 19                                                                                                                                                                                                                                                                | PRPF19         |
| RuvB-like 2                                                                                                                                                                                                                                                                                  | RUVBL2         |
| Voltage-dependent anion-selective channel protein 3                                                                                                                                                                                                                                          | VDAC3          |
| tRNA-splicing ligase RtcB homolog                                                                                                                                                                                                                                                            | RTCB           |

**Table S2.**

| Gene name | Neighborhoods | Compartments |                      |
|-----------|---------------|--------------|----------------------|
| ATL3      | Secretory     | S1           | Up in RPMI           |
| RPL23A    | Secretory     | S1           | Up in RPMI           |
| SCAMP3    | Secretory     | S1           | Up in RPMI           |
| ZC3HAV1   | Secretory     | S1           | Up in RPMI           |
| CKAP4     | Secretory     | S2           | Up in RPMI           |
| CYB5R3    | Secretory     | S2           | Up in RPMI           |
| FAF2      | Secretory     | S2           | Up in RPMI           |
| GLIPR2    | Secretory     | S2           | <b>Up in EndoGro</b> |
| HLA-C     | Secretory     | S2           | Up in RPMI           |
| IKBIP     | Secretory     | S2           | <b>Up in EndoGro</b> |
| NT5E      | Secretory     | S2           | Up in RPMI           |
| PGRMC2    | Secretory     | S2           | Up in RPMI           |
| RPN2      | Secretory     | S2           | Up in RPMI           |
| TECR      | Secretory     | S2           | <b>Up in EndoGro</b> |
| TMX1      | Secretory     | S2           | <b>Up in EndoGro</b> |
| TMX1      | Secretory     | S2           | <b>Up in EndoGro</b> |
| CAT       | Secretory     | S3           | <b>Up in EndoGro</b> |
| CNP       | Secretory     | S3           | <b>Up in EndoGro</b> |
| EPHA2     | Secretory     | S4           | Up in RPMI           |
| GNB2      | Secretory     | S4           | Up in RPMI           |
| ATP2A2    | Secretory     | Unclassified | <b>Up in EndoGro</b> |
| ESYT2     | Secretory     | Unclassified | <b>Up in EndoGro</b> |
| HLA-B     | Secretory     | Unclassified | Up in RPMI           |
| ITGA2     | Secretory     | Unclassified | Up in RPMI           |
| MYO1B     | Secretory     | Unclassified | Up in RPMI           |
| RPS15A    | Secretory     | Unclassified | Up in RPMI           |
| STOM      | Secretory     | Unclassified | Up in RPMI           |
| STXBP3    | Secretory     | Unclassified | <b>Up in EndoGro</b> |

| Compartments                                                                                                                                                                                                                                                                                                              | Neighborhoods                                                                                     |
|---------------------------------------------------------------------------------------------------------------------------------------------------------------------------------------------------------------------------------------------------------------------------------------------------------------------------|---------------------------------------------------------------------------------------------------|
| <ul style="list-style-type: none"> <li><span style="color: yellow;">■</span> S1, Golgi, Endo/Lysosome</li> <li><span style="color: orange;">■</span> S2, ER, Peroxisome</li> <li><span style="color: red;">■</span> S3, ER, Mito. Ribosome</li> <li><span style="color: darkred;">■</span> S4, Plasma Membrane</li> </ul> | <ul style="list-style-type: none"> <li><span style="color: yellow;"> </span> Secretory</li> </ul> |

6. Supplementary Data of *in vivo* studies

**Figure S5.** Results of *in vivo* live animal Imaging study, comparing CVs from hCMEC/D3 cells grown in RPMI or EndoGro medium.

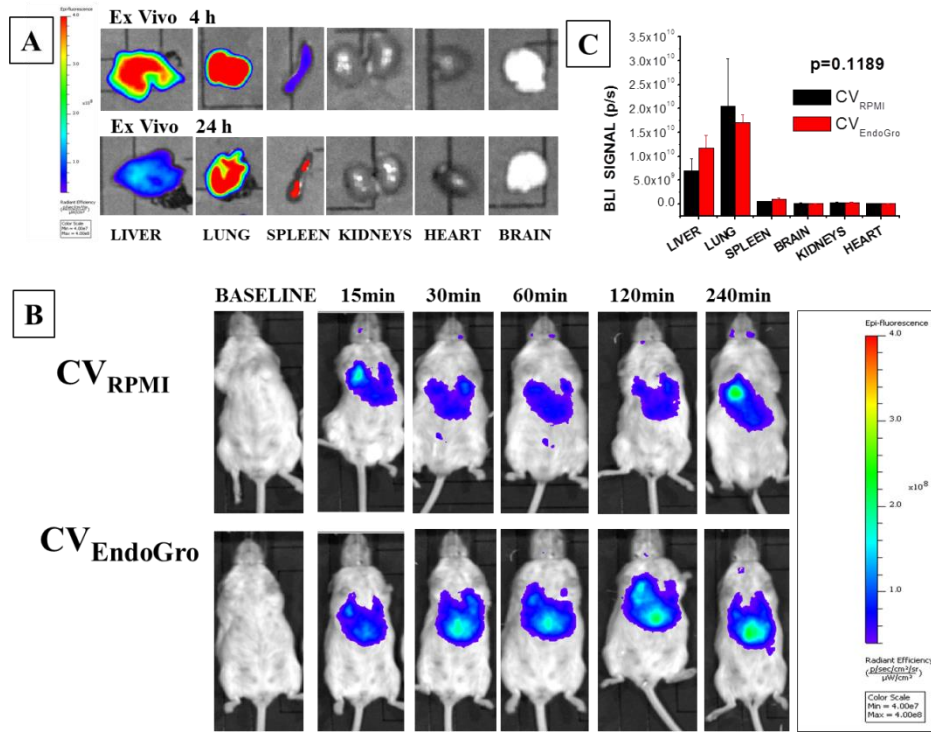

**Figure S5.** A) *Ex vivo* imaging of extracted organs after 4 and 24h of injection of 100ug lipid/mouse of CV<sub>RPMI</sub>. All images are in the same scale B) Representative bio fluorescence signals (photons/sec) of CV-associated DiR after injection of 200ug lipid/mouse CV<sub>RPMI</sub> (upper panel) or CV<sub>EndoGro</sub> (lower panel). All images are in the same scale. C) *Ex vivo* DiR Signal values of organs extracted from the animals of the previous experiment, 4 h post-injection. Each value is the mean from 5 animals and SDs are presented as error bars.
